# Supplementary material for: Impact of tumor growth rate during preceding treatment on tumor response to nivolumab or irinotecan in advanced gastric cancer
Source: PubMed Central journal article supplement — ESMO Open. 2021 Jun 10;6(4):100179. doi: 10.1016/j.esmoop.2021.100179 (PMC8209093; doi:10.1016/j.esmoop.2021.100179), 2021-06-10
Supplement: mmc1.pdf [file mmc1.pdf]

Refractory AGC patients treated with NIVO or IRI for the first time from January 2015 to June 2018 at three institutions (n = 212)

CT not performed before NIVO/IRI (n = 20)

No measurable lesions (n = 56)

No tumor refractoriness or intolerance to fluoropyrimidines and taxanes (n = 19)

**Eligible patients (n = 117), NIVO (n = 32), IRI (n = 85)**

**Rapid group (n = 72)**

NIVO (n = 19) (NL-/+ : 13/6)

IRI (n = 53) (NL-/+ : 37/16)

**Slow group (n = 45)**

NIVO (n = 13)

IRI (n = 32)
