# Supplementary material for: Impact of tumor growth rate during preceding treatment on tumor response to nivolumab or irinotecan in advanced gastric cancer
Source: PubMed Central journal article supplement — ESMO Open. 2021 Jun 10;6(4):100179. doi: 10.1016/j.esmoop.2021.100179 (PMC8209093; doi:10.1016/j.esmoop.2021.100179), 2021-06-10
Supplement: mmc3.pdf [file mmc3.pdf]

Supplementary TableS1: Association between the interval between two CT scans that were used to assess TGR and allocation of patients into the Rapid or Slow groups

| Group                                                                        | Interval A |      | Interval B              |      | Interval C |      |
|------------------------------------------------------------------------------|------------|------|-------------------------|------|------------|------|
| Interval between two CT scans                                                | ≤ 6 weeks  |      | > 6 weeks and ≤12 weeks |      | > 12 weeks |      |
| N                                                                            | 10         |      | 81                      |      | 26         |      |
| Rapid group (%)                                                              | 8          | (80) | 51                      | (63) | 13         | (50) |
| Slow group (%)                                                               | 2          | (20) | 30                      | (37) | 13         | (50) |
| p-value (A vs. B) = 0.49; p-value (B vs. C) = 0.26, p-value (C vs. A) = 0.14 |            |      |                         |      |            |      |
