# Supplementary material for: Impact of tumor growth rate during preceding treatment on tumor response to nivolumab or irinotecan in advanced gastric cancer
Source: PubMed Central journal article supplement — ESMO Open. 2021 Jun 10;6(4):100179. doi: 10.1016/j.esmoop.2021.100179 (PMC8209093; doi:10.1016/j.esmoop.2021.100179), 2021-06-10
Supplement: mmc4.pdf [file mmc4.pdf]

Supplemental TableS2: Association between interval from initiation of nivolumab or irinotecan to the first CT evaluation and drugs

| Interval from initiation of NIVO or IRI to the first CT evaluation |               | ≤ 6 weeks |      | > 6 weeks and ≤12 weeks |      | > 12 weeks |      | p-value |
|--------------------------------------------------------------------|---------------|-----------|------|-------------------------|------|------------|------|---------|
| Rapid group                                                        | NIVO (n = 16) | 6         | (37) | 10                      | (63) | 0          | 0    | 0.099   |
|                                                                    | IRI (n = 46)  | 7         | (15) | 34                      | (74) | 5          | (11) |         |
| Slow group                                                         | NIVO (n = 10) | 1         | (10) | 9                       | (90) | 0          | 0    | 0.81    |
|                                                                    | IRI (n = 29)  | 6         | (21) | 21                      | (72) | 2          | (7)  |         |
