# Supplementary figures and images for: Impact of tumor growth rate during preceding treatment on tumor response to nivolumab or irinotecan in advanced gastric cancer
Source: PubMed Central journal article supplement — ESMO Open. 2021 Jun 10;6(4):100179. doi: 10.1016/j.esmoop.2021.100179 (PMC8209093; doi:10.1016/j.esmoop.2021.100179), 2021-06-10

**A**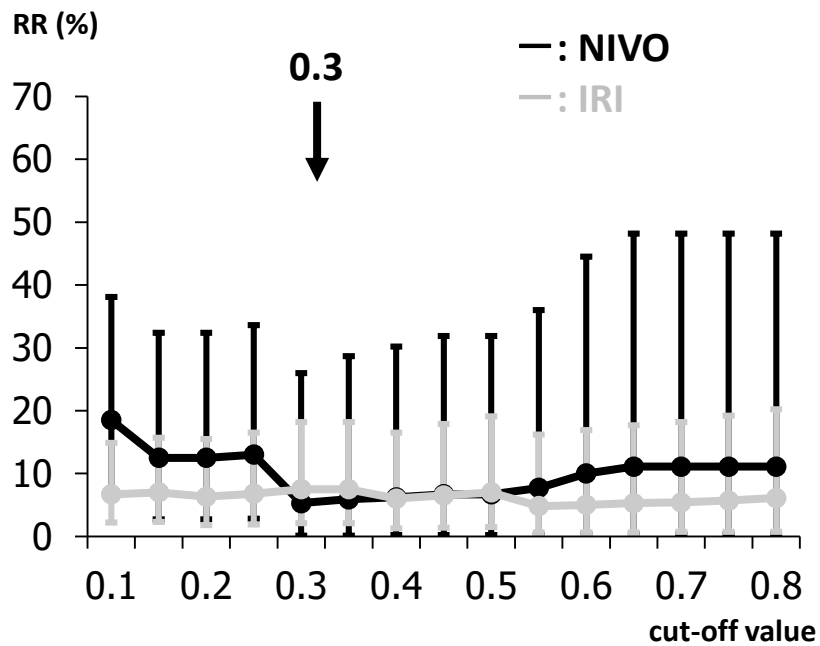

| TGR cutoff | 0.1 | 0.2 | 0.3 | 0.4 | 0.5 | 0.6 | 0.7 | 0.8 |
|------------|-----|-----|-----|-----|-----|-----|-----|-----|
| NIVO (n)   | 27  | 24  | 19  | 16  | 15  | 10  | 9   | 9   |
| IRI (n)    | 75  | 63  | 53  | 50  | 43  | 40  | 37  | 33  |

**B**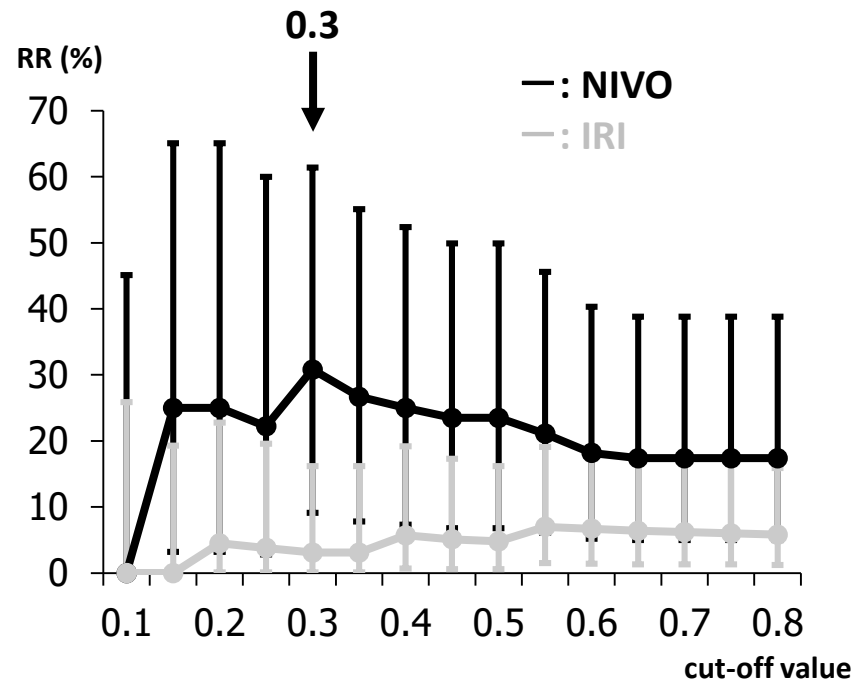

| TGR cutoff | 0.1 | 0.2 | 0.3 | 0.4 | 0.5 | 0.6 | 0.7 | 0.8 |
|------------|-----|-----|-----|-----|-----|-----|-----|-----|
| NIVO (n)   | 5   | 8   | 13  | 16  | 17  | 22  | 23  | 23  |
| IRI (n)    | 10  | 22  | 32  | 35  | 42  | 45  | 48  | 52  |

Supplement: mmc2.pdf [file mmc2.pdf]
